# Supplementary material for: Screening of Graves' disease susceptibility genes by whole exome sequencing in a three-generation family
Source: BMC Med Genomics. 2021 Feb 10;14:46. doi: 10.1186/s12920-020-00865-z (PMC7874465; doi:10.1186/s12920-020-00865-z)
Supplement: Supplementary file 1 — Additional file 1. Gene function analysis. [file 12920_2020_865_MOESM1_ESM.xlsx]

## Sheet: Sheet1
Gene	GO_BP	GO_MF	GO_CC	KEGG_Pathway
MAP7D2
SLC1A7	GO:0006811,ion transport|GO:0006835,dicarboxylic acid transport|GO:0015813,L-glutamate transport|GO:0055085,transmembrane transport|	GO:0017153,sodium:dicarboxylate symporter activity|GO:0005313,L-glutamate transmembrane transporter activity|	GO:0016021,integral to membrane|GO:0005886,plasma membrane|	REACT_13685,Neuronal System|REACT_12591,Glutamate Neurotransmitter Release Cycle|REACT_13477,Transmission across Chemical Synapses|REACT_15518,Transmembrane transport of small molecules|REACT_19397,Transport of inorganic cations/anions and amino acids/oligopeptides|REACT_19118,SLC-mediated transmembrane transport|REACT_13723,Neurotransmitter Release Cycle|ko04724,Glutamatergic synapse|hsa04724,Gl…
TRAF3IP3		GO:0005515,protein binding|	GO:0016021,integral to membrane|
PTPRB	GO:0016311,dephosphorylation|GO:0006470,protein dephosphorylation|GO:0006796,phosphate-containing compound metabolic process|GO:0001525,angiogenesis|	GO:0005515,protein binding|GO:0005001,transmembrane receptor protein tyrosine phosphatase activity|	GO:0005887,integral to plasma membrane|	ko04520,Adherens junction|hsa04520,Adherens junction|
PIK3R3	GO:0031295,T cell costimulation|GO:0007596,blood coagulation|GO:0030168,platelet activation|GO:0036092,phosphatidylinositol-3-phosphate biosynthetic process|GO:0006661,phosphatidylinositol biosynthetic process|GO:0008286,insulin receptor signaling pathway|GO:0006644,phospholipid metabolic process|GO:0044281,small molecule metabolic process|	GO:0046935,1-phosphatidylinositol-3-kinase regulator activity|GO:0016303,1-phosphatidylinositol-3-kinase activity|	GO:0005942,phosphatidylinositol 3-kinase complex|GO:0005829,cytosol|	ko05142,Chagas disease (American trypanosomiasis)|REACT_1695,GPVI-mediated activation cascade|hsa05211,Renal cell carcinoma|ko05215,Prostate cancer|WP437,EGFR1 Signaling Pathway|hsa04510,Focal adhesion|hsa05223,Non-small cell lung cancer|REACT_18407,G alpha (12/13) signalling events|ko04666,Fc gamma R-mediated phagocytosis|hsa05160,Hepatitis C|ko05212,Pancreatic cancer|hsa04670,Leukocyte transend…
DISC1	GO:0021846,cell proliferation in forebrain|GO:0051602,response to electrical stimulus|GO:0060070,canonical Wnt receptor signaling pathway|GO:0010975,regulation of neuron projection development|GO:0000226,microtubule cytoskeleton organization|GO:0001764,neuron migration|GO:0021799,cerebral cortex radially oriented cell migration|GO:0031929,TOR signaling cascade|GO:2000060,positive regulation of pr…	GO:0005515,protein binding|	GO:0033267,axon part|GO:0005871,kinesin complex|GO:0005739,mitochondrion|GO:0044297,cell body|GO:0045211,postsynaptic membrane|GO:0005886,plasma membrane|GO:0030054,cell junction|GO:0014069,postsynaptic density|GO:0005874,microtubule|GO:0005813,centrosome|
